# Supplementary material
Source: PubMed Central journal article supplement (PMC4130345)
Supplement: NIHMS607161-supplement-01.pdf [file NIHMS607161-supplement-01.pdf]

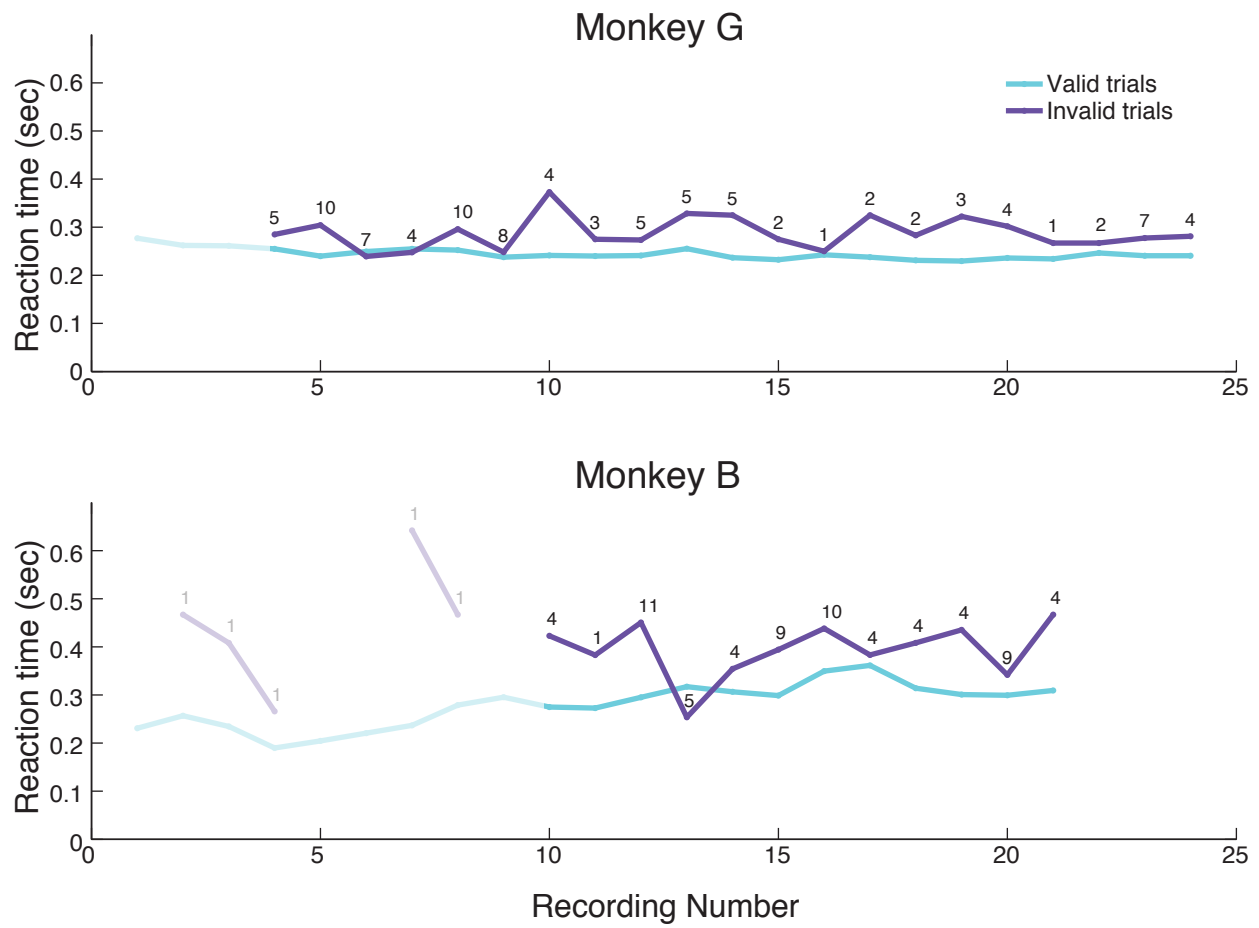

Figure S1  
Steinmetz & Moore

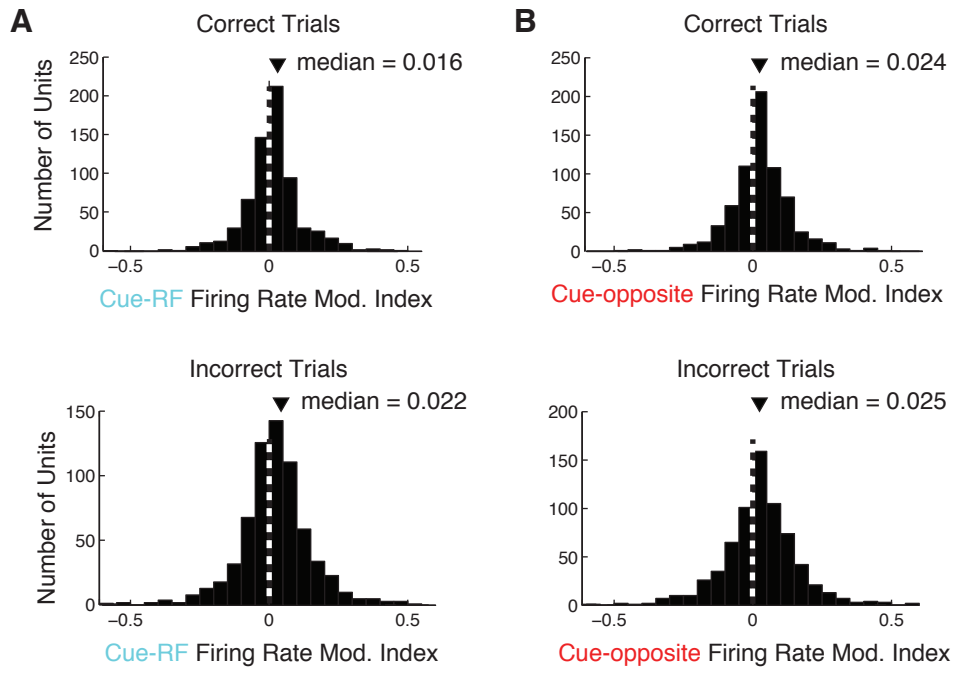

Figure S2  
Steinmetz & Moore

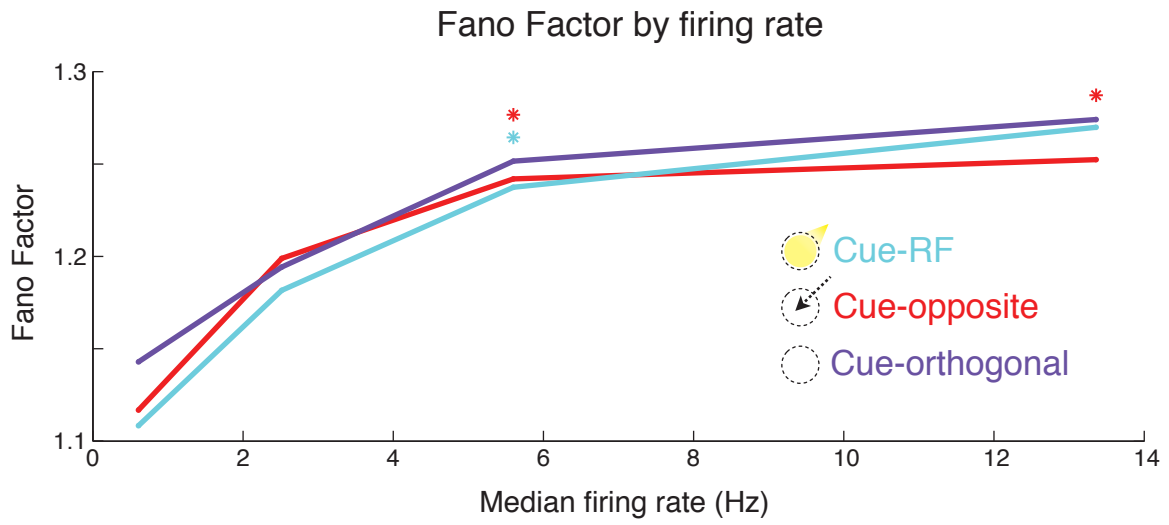

Figure S3  
Steinmetz & Moore

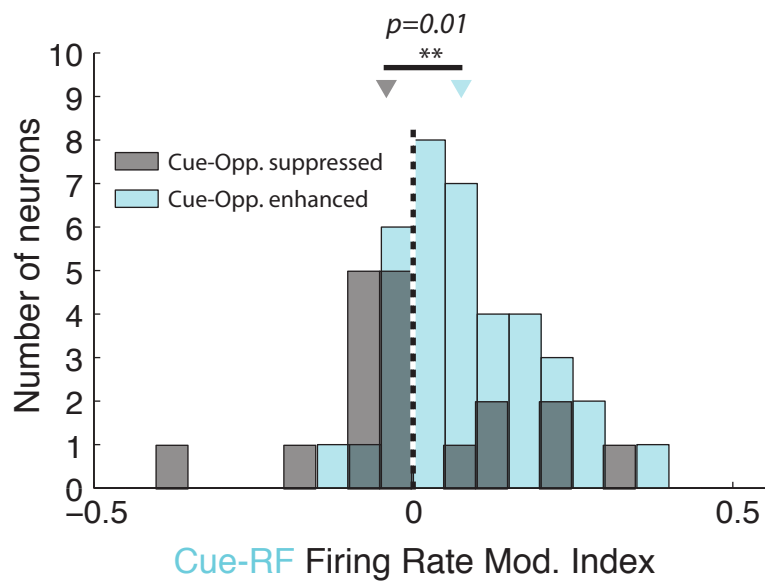

Figure S4  
Steinmetz & Moore

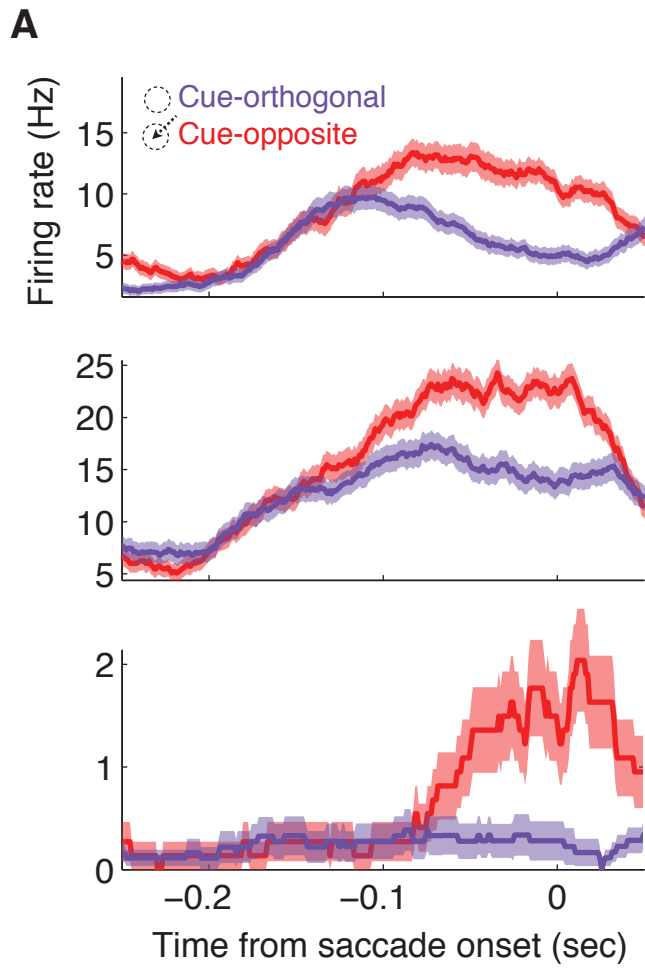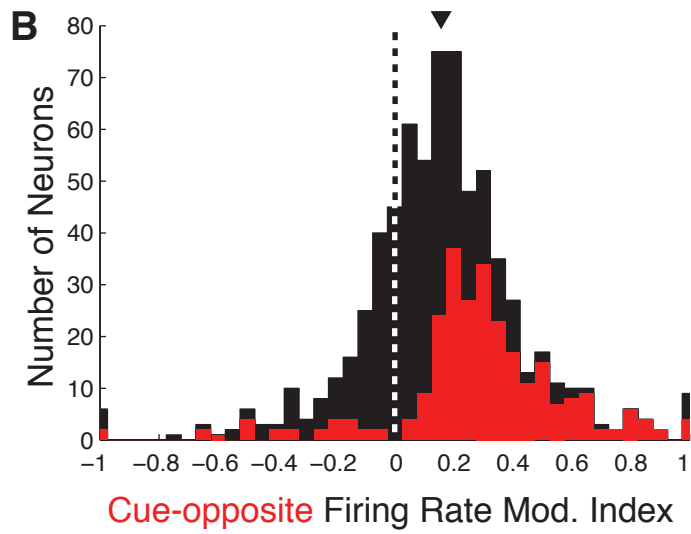

Figure S5  
Steinmetz & Moore
